# Supplementary material for: Surveillance of Post-Vaccination Side Effects of COVID-19 Vaccines among Saudi Population: A Real-World Estimation of Safety Profile
Source: MDPI journal article supplement (doi:10.3390/vaccines10060924), 2022-06-10
Supplement: s1 [file Supplementary file 1.pdf › Supplementary file 1.pdf]

Supp Table S1; *Linear regression across demographics and individual side effects*

|                                | Gender | Geographic location | Age   | Occupation | Profession | Monthly income | Marital status | Nationality | Education | type of Vaccine |
|--------------------------------|--------|---------------------|-------|------------|------------|----------------|----------------|-------------|-----------|-----------------|
|                                | $R^2$  | $R^2$               | $R^2$ | $R^2$      | $R^2$      | $R^2$          | $R^2$          | $R^2$       | $R^2$     | $R^2$           |
| Pain at the injection site     | 1.74   | 0.11                | 0.672 | 0.0144     | 1.1025     | 0.0016         | 0.0225         | 0.0529      | 0.3025    | 3.00            |
| Redness at the injection site  | 2.56   | 0.31                | 0.026 | 1.2544     | 0.5929     | 0.2916         | 0.6084         | 0.0004      | 0.0064    | 0.90            |
| Swelling at the injection site | 2.46   | 0.07                | 0.212 | 0.6241     | 0.1089     | 0.1936         | 0.0841         | 0.0064      | 0.25      | 0.20            |
| Fever                          | 1.74   | 1.44                | 1.061 | 0.01       | 1.0201     | 1.8496         | 0.0256         | 2.5921      | 0.1681    | 20.40           |
| Bone or joint pain             | 1.77   | 1.06                | 0.593 | 0.0784     | 0.36       | 1.9044         | 0.9216         | 1.8769      | 0.0169    | 12.70           |
| Fatigue                        | 1.93   | 2.40                | 2.372 | 0.0324     | 0.1024     | 1.2996         | 2.1025         | 1.8225      | 0.0289    | 16.10           |
| Loss of appetite               | 7.90   | 0.24                | 0.757 | 0.0121     | 0.2209     | 2.6569         | 2.3104         | 2.1609      | 1         | 3.00            |
| Headache                       | 2.40   | 1.04                | 0.281 | 0.0529     | 0.0256     | 0.2704         | 1.2996         | 0.2704      | 0.0009    | 1.80            |
| Sexual disturbance             | 1.96   | 1.02                | 0.152 | 0.0121     | 0.1764     | 3.3124         | 0.9025         | 0.1225      | 5.76      | 1.40            |
| Drowsiness                     | 0.40   | 0.05                | 0.073 | 0.0676     | 0.1764     | 0.2809         | 0.0049         | 1           | 0.0576    | 1.10            |
| Nausea                         | 0.23   | 0.01                | 0.084 | 0.0144     | 0.2916     | 0.1681         | 0.0484         | 0.1444      | 0.3249    | 0.00            |
| Shortness of breath            | 1.14   | 0.08                | 0     | 0.2601     | 0.0225     | 0.5329         | 0.0081         | 0.64        | 0.0361    | 0.00            |
| Diarrhea                       | 0.49   | 0.55                | 0.017 | 0.0049     | 0.09       | 0.0361         | 0.3025         | 0.0441      | 0         | 0.00            |
| Chills                         | 0.11   | 0.13                | 0.017 | 0.0049     | 0.5329     | 0.81           | 0.3249         | 0.0441      | 0         | 0.00            |
| Insomnia                       | 0.02   | 1.21                | 0.194 | 0.3721     | 0.0121     | 0.09           | 0.2401         | 0.0324      | 0.1521    | 0.00            |
| Tightness in the hand          | 0.19   | 0.12                | 0.053 | 0.8836     | 0.0001     | 0.0121         | 1.0609         | 0.0529      | 0.0961    | 0.70            |
| Numbness                       | 1.46   | 0.00                | 1.02  | 0.0049     | 0.09       | 0.9801         | 0.3025         | 0.0441      | 0.2025    | 0.00            |
| Psychological                  | 0.02   | 0.04                | 0.757 | 0.0484     | 1.1664     | 0.09           | 0.0036         | 1.69        | 0.8281    | 0.20            |

|                          |      |      |       |        |        |        |        |        |        |      |
|--------------------------|------|------|-------|--------|--------|--------|--------|--------|--------|------|
| Taste                    | 0.72 | 0.29 | 0.106 | 0.0025 | 0.0225 | 0.2809 | 2.8561 | 0.0225 | 0.1024 | 0.70 |
| Heaviness                | 0.02 | 0.66 | 0.792 | 0.1521 | 0.0225 | 0.2209 | 1.3689 | 0.0225 | 0      | 0.70 |
| Sleep disturbance        | 0.21 | 0.18 | 0     | 0.0036 | 1.1664 | 0.09   | 0.6241 | 0.0324 | 0.0169 | 1.00 |
| Fainting                 | 0.36 | 0.00 | 0.25  | 0.8649 | 0.3844 | 0.3721 | 0.2116 | 0.01   | 0.4624 | 0.30 |
| Blurred vision           | 0.18 | 0.14 | 0.25  | 0.8649 | 0.1681 | 0.1089 | 0.2116 | 0.01   | 0.0484 | 0.30 |
| Rapid heart rate         | 0.36 | 0.14 | 0.063 | 0.2025 | 0.1681 | 0.0196 | 0.0784 | 0.01   | 0.0529 | 0.20 |
| Osteomalacia             | 0.18 | 1.28 | 0.063 | 0.2025 | 0.1681 | 0.0196 | 0.0784 | 0.01   | 0.4624 | 0.30 |
| Thinking                 | 0.18 | 0.14 | 0.063 | 0.0009 | 0.1681 | 0.64   | 0.0784 | 0.01   | 0.4489 | 0.30 |
| Inability to concentrate | 0.18 | 0.14 | 0.063 | 0.0009 | 0.1681 | 0.64   | 0.0784 | 0.01   | 0.4489 | 0.30 |

*Linear regression was applied to find  $R^2$  values.*
