# Supplementary material for: Surveillance of Post-Vaccination Side Effects of COVID-19 Vaccines among Saudi Population: A Real-World Estimation of Safety Profile
Source: MDPI journal article supplement (doi:10.3390/vaccines10060924), 2022-06-10
Supplement: s1 [file Supplementary file 2.pdf › Supplementary file 2.pdf]

## Surveillance of post-vaccination side effects of COVID-19 vaccines among Saudi Population: A real-world estimation of Safety Profile

This research project will help to understand the prevalence of side effects associated with the COVID-19 vaccine doses after first and second dose. It will just take 5 minutes from your precious time. Your response will greatly help us to find out which type of side effects were prevailing in the Saudi population. Please fill this survey, if you consent to participate. Your cooperation will be greatly appreciated.

### Section 1; Demographics

1. **Age**
  - a) 18 - 35 years
  - b) 36 - 50 years
  - c) >50 years
2. **Gender**
  - a) Male
  - b) Female
3. **Geographic location**
  - a) Central Region
  - b) Northern Region
  - c) Eastern Region
  - d) Southern Region
  - e) Western Region
4. **Occupation**
  - a) Students
  - b) Private sector employees
  - c) Government sector employees
  - d) Retired
  - e) Own Business
5. **Occupational field**
  - a) Medical
  - b) non-medical
6. **Average monthly income**
  - a) < 5 thousand SAR
  - b) 5 - 15 thousand SAR
  - c) 15 - 20 thousand SAR
  - d) 20 thousand SAR
7. **Marital status**
  - a) Married
  - b) Single
  - c) Divorced
8. **Nationality**
  - a) Saudis
  - b) Non-Saudis
9. **Highest Certificate Obtained**
  - a) High school
  - b) Bachelor's degree
  - c) Masters
  - d) Ph.D.
  - e) Post-secondary diploma
10. **Type of vaccine received**
  - a) Pfizer
  - b) AstraZeneca
11. **Second dose received**
  - a) Yes
  - b) No
12. **Time recommended for 2nd dose**
  - a) 3 weeks
  - b) 3 months

### Section 2; Side effect Profile

*Note; Please tick the side effect which occurred after COVID-19 vaccination*

| Side Effect                    | Yes | No | Side Effect              | Yes | No |
|--------------------------------|-----|----|--------------------------|-----|----|
| Pain at the injection site     |     |    | Insomnia                 |     |    |
| Redness at the injection site  |     |    | Tightness in the hand    |     |    |
| Swelling at the injection site |     |    | Numbness                 |     |    |
| Fever                          |     |    | Psychological            |     |    |
| Bone or joint pain             |     |    | Taste                    |     |    |
| Fatigue                        |     |    | Heaviness                |     |    |
| Loss of appetite               |     |    | Sleep disturbance        |     |    |
| Headache                       |     |    | Fainting                 |     |    |
| Sexual disturbance             |     |    | Blurred vision           |     |    |
| Drowsiness                     |     |    | Rapid heart rate         |     |    |
| Nausea                         |     |    | Osteomalacia             |     |    |
| Shortness of breath            |     |    | Thinking                 |     |    |
| Diarrhea                       |     |    | Inability to concentrate |     |    |
| Chills                         |     |    | Other                    |     |    |
